# Supplementary material for: Human immunoglobulin gene allelic variation impacts germline-targeting vaccine priming
Source: PubMed Central journal article supplement (PMC11384754; doi:10.1038/s41541-024-00811-5), 2024-03-11
Supplement: 41541_2024_811_MOESM1_ESM.pdf [file 41541_2024_811_MOESM1_ESM.pdf]

**a**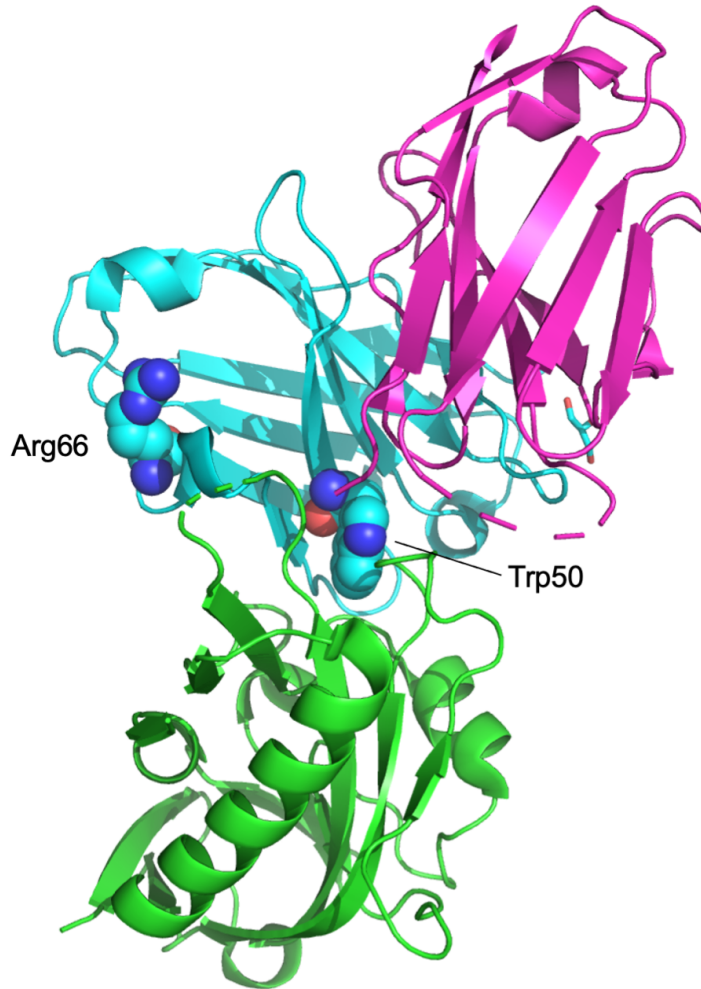**b**

|            | 1     | 10 | 20 | 30 | 40 | 50 | 52a | 60 | 70 | 80 | 82a | 82c | 90 |   |   |      |   |   |   |   |   |   |   |   |   |   |   |   |   |   |   |   |   |   |   |   |   |   |   |   |   |   |   |   |   |   |   |   |   |   |   |   |   |   |   |   |   |   |   |   |   |   |   |   |   |   |   |   |   |   |   |   |   |   |   |   |   |   |   |   |   |   |   |   |   |   |   |   |   |   |   |   |   |   |
|------------|-------|----|----|----|----|----|-----|----|----|----|-----|-----|----|---|---|------|---|---|---|---|---|---|---|---|---|---|---|---|---|---|---|---|---|---|---|---|---|---|---|---|---|---|---|---|---|---|---|---|---|---|---|---|---|---|---|---|---|---|---|---|---|---|---|---|---|---|---|---|---|---|---|---|---|---|---|---|---|---|---|---|---|---|---|---|---|---|---|---|---|---|---|---|---|---|
| IGHV1-2*02 | Q     | V  | L  | V  | Q  | S  | G   | A  | E  | V  | K   | K   | P  | G | A | S    | V | K | V | S | C | K | A | S | G | Y | T | F | T | G | Y | Y | M | H | W | R | Q | A | P | Q | G | L | E | W | M | G | W | I | N | P | N | S | G | G | T | N | Y | A | Q | K | F | Q | G | R | V | T | M | T | R | D | T | S | I | S | T | A | Y | M | E | L | S | R | L | R | S | D | D | T | A | V | Y | C | A | R |
| IGHV1-2*04 | ..... |    |    |    |    |    |     |    |    |    |     |     |    |   |   |      |   |   |   |   |   |   |   |   |   |   |   |   |   |   |   |   |   |   |   |   |   |   |   |   |   |   |   |   |   |   |   |   |   |   |   |   |   |   |   |   |   |   |   |   |   |   |   |   |   |   |   |   |   |   |   |   |   |   |   |   |   |   |   |   |   |   |   |   |   |   |   |   |   |   |   |   |   |   |
| IGHV1-2*05 | ..... |    |    |    |    |    |     |    |    |    |     |     |    |   |   |      |   |   |   |   |   |   |   |   |   |   |   |   |   |   |   |   |   |   |   |   |   |   |   |   |   |   |   |   |   |   |   |   |   |   |   |   |   |   |   |   |   |   |   |   |   |   |   |   |   |   |   |   |   |   |   |   |   |   |   |   |   |   |   |   |   |   |   |   |   |   |   |   |   |   |   |   |   |   |
| IGHV1-2*06 | ..... |    |    |    |    |    |     |    |    |    |     |     |    |   |   |      |   |   |   |   |   |   |   |   |   |   |   |   |   |   |   |   |   |   |   |   |   |   |   |   |   |   |   |   |   |   |   |   |   |   |   |   |   |   |   |   |   |   |   |   |   |   |   |   |   |   |   |   |   |   |   |   |   |   |   |   |   |   |   |   |   |   |   |   |   |   |   |   |   |   |   |   |   |   |
|            | CDR1  |    |    |    |    |    |     |    |    |    |     |     |    |   |   | CDR2 |   |   |   |   |   |   |   |   |   |   |   |   |   |   |   |   |   |   |   |   |   |   |   |   |   |   |   |   |   |   |   |   |   |   |   |   |   |   |   |   |   |   |   |   |   |   |   |   |   |   |   |   |   |   |   |   |   |   |   |   |   |   |   |   |   |   |   |   |   |   |   |   |   |   |   |   |   |   |

**Supplementary Figure 1. Locations of key allele-defining mutations in the structure and sequence of IGHV1-2.** (a) Structural model of eOD-GT8 (green) bound to a VRC01-class human naive precursor (cyan, purple), based on PDB: 5IES. Antibody heavy chain residues Trp50, present in IGHV1-2\*02 but mutated to Arg50 in IGHV1-2\*05 and \*06, is shown in spheres and labelled. Trp50, which is highly conserved across VRC01-class bnAbs (the only exception being the bnAb 12A21 with Leu50)<sup>9,10,12,23,52-54</sup>, interacts with the highly conserved HIV gp120 residue Asn280<sup>10-12,53-55</sup> (not shown) and is generally considered a canonical part of the VRC01-class interaction with HIV Env. Antibody heavy chain residue Arg66, present in IGHV1-2\*02 but mutated to Trp66 in IGHV1-2\*04, is shown in spheres and labelled. (b) IGHV1-2 sequence alignment showing alleles confirmed by single nucleotide polymorphism (SNP) analysis and other methods<sup>15</sup>.

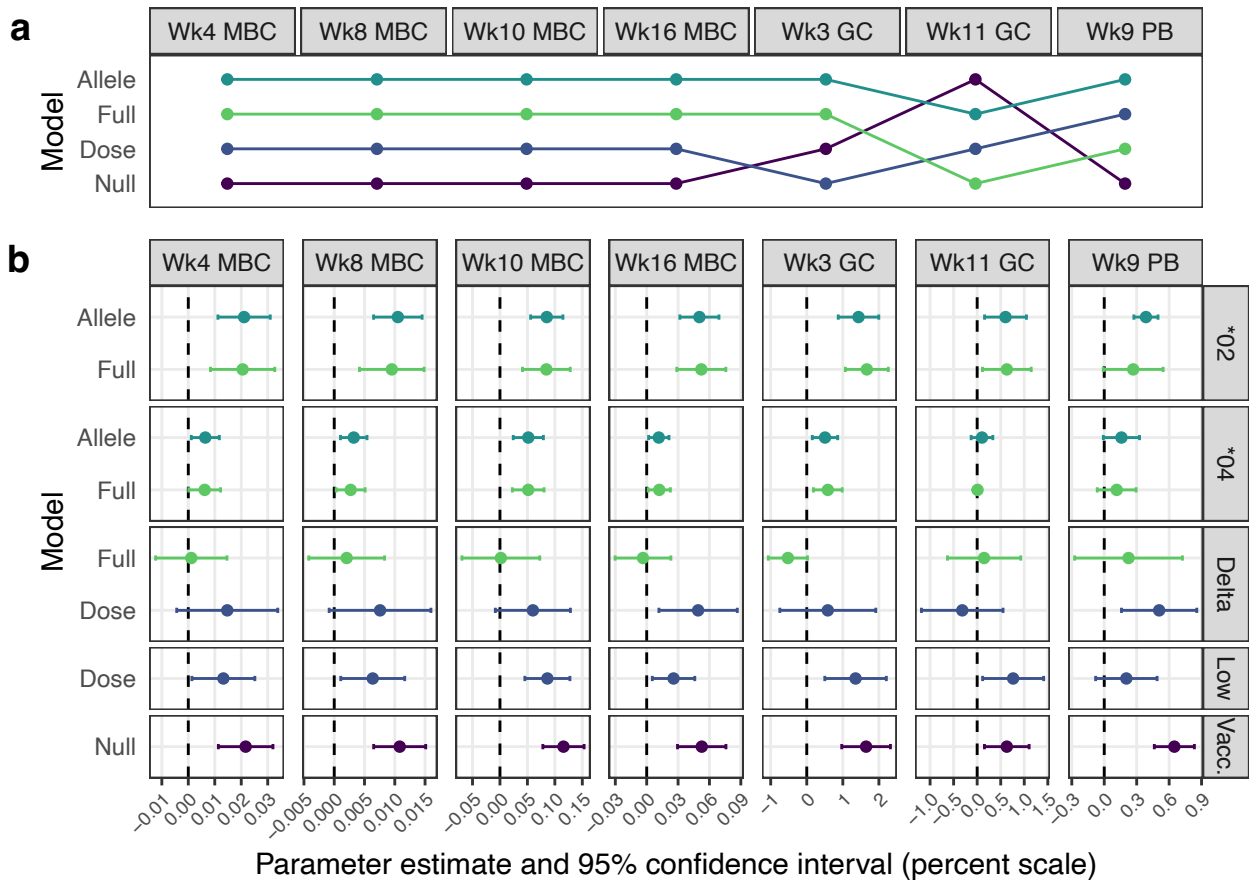

**Supplementary Figure 2. Statistical modeling of post-vaccination VRC01-class B cell frequencies.** (a) Model rankings from QAICc (see text and Methods) are shown as best to worst, from top to bottom, for each sample type and timepoint shown left to right. For all MBC timepoints, models were ranked in the same order from best to worst: (i) Allele, (ii) Full, (iii) Dose, and (iv) Null. Each color-coded line connects the ranking of the models across time points. (b) Points and lines show estimates and 95% confidence intervals (CIs) for each model parameter, for different models labelled on the y axis, at each time point labeled at the top of the graph. Model parameters representing the per-allele contributions of \*02 and \*04, the contributions of dose delta (100 $\mu$ g - 20 $\mu$ g) and dose=20 $\mu$ g, and a single estimate for the vaccine dose groups pooled (Null model) are grouped in rows \*02, \*04, Delta, Low and Vacc., respectively, as indicated on the right side of the panel. Parameter estimates and CIs are color-coded by model as in panel (a) and are displayed with values on the percent scale as indicated by the x-axis.

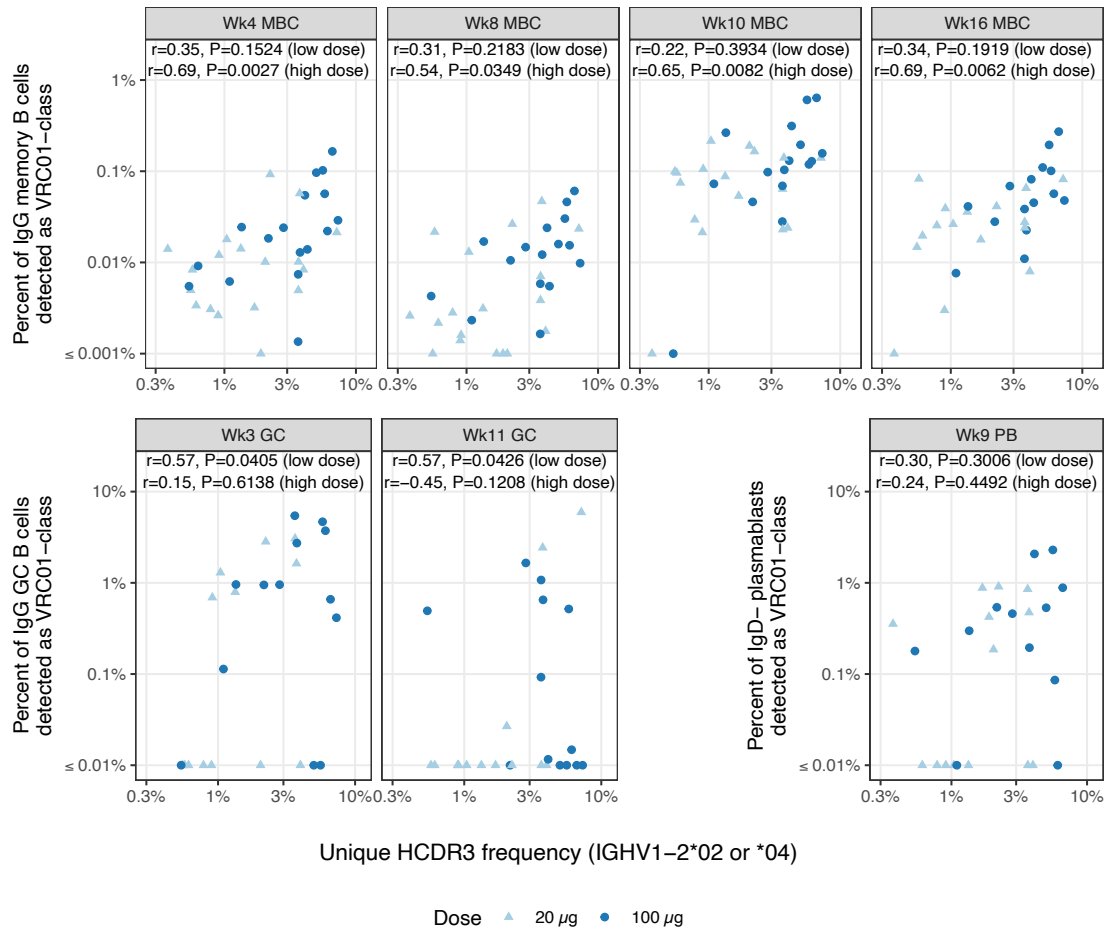

**Supplementary Figure 3. Correlations between pre-vaccination IgM unique HCDR3 frequency (IGHV1-2\*02 or \*04) and the percent VRC01-class B cell response by visit and treatment group.** Points are shape- and color-coded as shown in the legend. Spearman correlation coefficient ( $r$ ) and P-values are displayed for each time point and dose group.

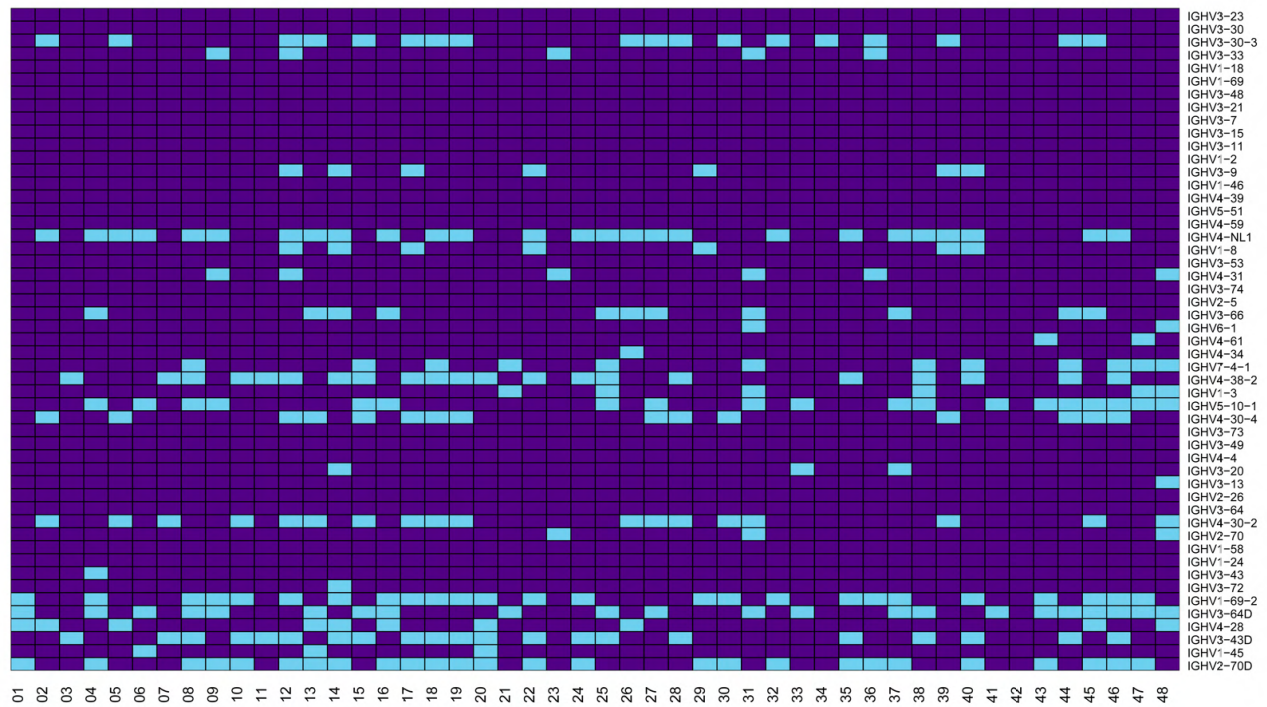

**Supplementary Figure 4. Captured IGHV genes in each of the 48 IAVI G001 trial participants.** The x-axis shows the G001 trial participant cases, and the y-axis shows the IGHV genes in the order they are found in typical IgM repertoires, with the most utilized genes at the top and the least utilized genes at the bottom. Captured (dark blue) and not captured (light blue) genes are indicated for each case.

**Supplementary Table 1:** IGHV1-2 genotype counts by treatment group.

| Treatment | *02/*02 | *02/*04 | *02/*05 | *02/*06 | *04/*04 | *04/*05 | *04/*06 | *05/*06 |
|-----------|---------|---------|---------|---------|---------|---------|---------|---------|
| 100 µg    | 7       | 4       | 2       | 0       | 1       | 1       | 2       | 1       |
| 20 µg     | 1       | 4       | 0       | 0       | 7       | 1       | 5       | 0       |
| Placebo   | 3       | 5       | 0       | 2       | 2       | 0       | 0       | 0       |
| Total     | 11      | 13      | 2       | 2       | 10      | 2       | 7       | 1       |

**Supplementary Table 2:** Frequency of IGHV1-2 mRNA expression in the naive repertoire. The number of trial participants (n), mean, 95% confidence interval (95% CI), minimum (Min) and maximum (Max) are reported for groups defined by homozygous or heterozygous genotypes including each allele. For participants homozygous for an allele, the per-allele frequency is defined as half the measured frequency of that allele. For \*02/\*02\_S4953 participants, the per-allele usage frequency is defined as half of the sum of the \*02 and \*02\_S4953 frequencies and the participant is classified as a \*02 homozygote.

|     | Allele       | n  | Mean  | 95% CI         | Min   | Max   |
|-----|--------------|----|-------|----------------|-------|-------|
| *02 | Homozygote   | 11 | 3.15% | 2.72% to 3.57% | 2.28% | 4.52% |
|     | Heterozygote | 17 | 3.34% | 2.87% to 3.82% | 1.98% | 6.29% |
| *04 | Homozygote   | 10 | 0.86% | 0.67% to 1.06% | 0.41% | 1.22% |
|     | Heterozygote | 22 | 0.72% | 0.63% to 0.81% | 0.25% | 1.12% |
| *05 | Heterozygote | 5  | 0.09% | 0.03% to 0.14% | 0.03% | 0.14% |
| *06 | Heterozygote | 10 | 2.43% | 1.87% to 2.99% | 1.78% | 4.18% |

**Supplementary Table 3:** Estimated difference in the mean per-allele frequency of IGHV1-2 mRNA expression between participants homozygotes and heterozygotes for each allele. For participants homozygous for an allele, the per-allele frequency is defined as half the measured frequency of that allele. The 95% confidence interval and P-value are based on a T-test for the null hypothesis that the true difference (mean among homozygous minus mean among heterozygous) is 0%.

| Allele | Difference | 95% CI          | P-value |
|--------|------------|-----------------|---------|
| *02    | -0.19%     | -0.80% to 0.41% | 0.51    |
| *04    | 0.14%      | -0.07% to 0.35% | 0.17    |

**Supplementary Table 4:** Percent of IgG B cells detected as VRC01-class testing between genotype groups among detectable response participants. Comparisons with at least 2 samples per group are included and P-values displayed for comparisons with at least 3 samples per group. Testing was done using the Wilcoxon rank-sum test. Median, minimum, and maximum values are presented by treatment group and time point. Unadjusted and FDR adjusted P-values displayed.

|               | Comparison                                | Sample Sizes | Median (Range)                                      | P Value    |              |
|---------------|-------------------------------------------|--------------|-----------------------------------------------------|------------|--------------|
|               |                                           |              |                                                     | Unadjusted | FDR Adjusted |
| <b>20 µg</b>  |                                           |              |                                                     |            |              |
| Wk4 MBC       | *02/*04 vs. *04/*04                       | 4 vs. 6      | 0.0092 [0.0049, 0.0572] vs. 0.0121 [0.0026, 0.0924] | 1.0000     | 1.0000       |
|               | *02/*04 vs. *04/*05 or *04/*06            | 4 vs. 6      | 0.0092 [0.0049, 0.0572] vs. 0.0066 [0.0031, 0.0140] | 0.4762     | 0.8081       |
|               | *04/*04 vs. *04/*05 or *04/*06            | 6 vs. 6      | 0.0121 [0.0026, 0.0924] vs. 0.0066 [0.0031, 0.0140] | 0.4848     | 0.8081       |
| Wk8 MBC       | *02/*04 vs. *04/*04                       | 4 vs. 4      | 0.0054 [0.0018, 0.0469] vs. 0.0081 [0.0014, 0.0264] | 0.8857     | 0.9797       |
|               | *02/*04 vs. *04/*05 or *04/*06            | 4 vs. 6      | 0.0054 [0.0018, 0.0469] vs. 0.0024 [0.0007, 0.0216] | 0.2571     | 0.8000       |
|               | *04/*04 vs. *04/*05 or *04/*06            | 4 vs. 6      | 0.0081 [0.0014, 0.0264] vs. 0.0024 [0.0007, 0.0216] | 0.3524     | 0.8000       |
| Wk10 MBC      | *02/*04 vs. *04/*04                       | 4 vs. 6      | 0.0440 [0.0230, 0.1404] vs. 0.1263 [0.0214, 0.2148] | 0.3524     | 0.8000       |
|               | *02/*04 vs. *04/*05 or *04/*06            | 4 vs. 6      | 0.0440 [0.0230, 0.1404] vs. 0.0854 [0.0005, 0.1057] | 0.7619     | 0.9797       |
|               | *04/*04 vs. *04/*05 or *04/*06            | 6 vs. 6      | 0.1263 [0.0214, 0.2148] vs. 0.0854 [0.0005, 0.1057] | 0.3939     | 0.8000       |
| Wk16 MBC      | *02/*04 vs. *04/*04                       | 4 vs. 5      | 0.0259 [0.0080, 0.0653] vs. 0.0263 [0.0030, 0.0412] | 0.9048     | 0.9797       |
|               | *02/*04 vs. *04/*05 or *04/*06            | 4 vs. 6      | 0.0259 [0.0080, 0.0653] vs. 0.0225 [0.0001, 0.0826] | 0.9143     | 0.9797       |
|               | *04/*04 vs. *04/*05 or *04/*06            | 5 vs. 6      | 0.0263 [0.0030, 0.0412] vs. 0.0225 [0.0001, 0.0826] | 0.9307     | 0.9797       |
| Wk3 GC        | *02/*04 vs. *04/*04                       | 2 vs. 3      | 2.3429 [1.6281, 3.0577] vs. 1.2946 [0.7917, 2.8275] | —          | —            |
| Wk9 PB        | *02/*04 vs. *04/*04                       | 2 vs. 4      | 0.6629 [0.4731, 0.8527] vs. 0.6510 [0.1856, 0.9081] | —          | —            |
| <b>100 µg</b> |                                           |              |                                                     |            |              |
| Wk4 MBC       | *02/*02 vs. *02/*04                       | 7 vs. 4      | 0.0566 [0.0139, 0.1649] vs. 0.0185 [0.0014, 0.0545] | 0.1091     | 0.7273       |
|               | *02/*02 vs. *02/*05 or *02/*06            | 7 vs. 2      | 0.0566 [0.0139, 0.1649] vs. 0.0129 [0.0074, 0.0184] | —          | —            |
|               | *02/*02 vs. *04/*05 or *04/*06            | 7 vs. 3      | 0.0566 [0.0139, 0.1649] vs. 0.0062 [0.0055, 0.0092] | 0.0167     | 0.2424       |
|               | *02/*04 vs. *02/*05 or *02/*06            | 4 vs. 2      | 0.0185 [0.0014, 0.0545] vs. 0.0129 [0.0074, 0.0184] | —          | —            |
|               | *02/*04 vs. *04/*05 or *04/*06            | 4 vs. 3      | 0.0185 [0.0014, 0.0545] vs. 0.0062 [0.0055, 0.0092] | 0.4000     | 0.8000       |
|               | *02/*05 or *02/*06 vs. *04/*05 or *04/*06 | 2 vs. 3      | 0.0129 [0.0074, 0.0184] vs. 0.0062 [0.0055, 0.0092] | —          | —            |
| Wk8 MBC       | *02/*02 vs. *02/*04                       | 7 vs. 4      | 0.0159 [0.0055, 0.0608] vs. 0.0134 [0.0016, 0.0240] | 0.3152     | 0.8000       |
|               | *02/*02 vs. *02/*05 or *02/*06            | 7 vs. 2      | 0.0159 [0.0055, 0.0608] vs. 0.0082 [0.0058, 0.0105] | —          | —            |
|               | *02/*02 vs. *04/*05 or *04/*06            | 7 vs. 2      | 0.0159 [0.0055, 0.0608] vs. 0.0033 [0.0023, 0.0043] | —          | —            |
|               | *02/*04 vs. *02/*05 or *02/*06            | 4 vs. 2      | 0.0134 [0.0016, 0.0240] vs. 0.0082 [0.0058, 0.0105] | —          | —            |
|               | *02/*04 vs. *04/*05 or *04/*06            | 4 vs. 2      | 0.0134 [0.0016, 0.0240] vs. 0.0033 [0.0023, 0.0043] | —          | —            |
|               | *02/*05 or *02/*06 vs. *04/*05 or *04/*06 | 2 vs. 2      | 0.0082 [0.0058, 0.0105] vs. 0.0033 [0.0023, 0.0043] | —          | —            |
| Wk10 MBC      | *02/*02 vs. *02/*04                       | 7 vs. 4      | 0.1951 [0.1188, 0.6376] vs. 0.1007 [0.0281, 0.1305] | 0.0242     | 0.2424       |
|               | *02/*02 vs. *02/*05 or *02/*06            | 7 vs. 2      | 0.1951 [0.1188, 0.6376] vs. 0.0577 [0.0461, 0.0692] | —          | —            |
|               | *02/*04 vs. *02/*05 or *02/*06            | 4 vs. 2      | 0.1007 [0.0281, 0.1305] vs. 0.0577 [0.0461, 0.0692] | —          | —            |
| Wk16 MBC      | *02/*02 vs. *02/*04                       | 7 vs. 4      | 0.1010 [0.0452, 0.2718] vs. 0.0457 [0.0110, 0.0817] | 0.1636     | 0.8000       |
|               | *02/*02 vs. *02/*05 or *02/*06            | 7 vs. 2      | 0.1010 [0.0452, 0.2718] vs. 0.0332 [0.0280, 0.0385] | —          | —            |
|               | *02/*04 vs. *02/*05 or *02/*06            | 4 vs. 2      | 0.0457 [0.0110, 0.0817] vs. 0.0332 [0.0280, 0.0385] | —          | —            |
| Wk3 GC        | *02/*02 vs. *02/*04                       | 4 vs. 3      | 2.1944 [0.4144, 4.6746] vs. 2.7265 [0.9546, 5.4440] | 0.6286     | 0.9670       |
| Wk11 GC       | *02/*02 vs. *02/*04                       | 2 vs. 4      | 0.2658 [0.0148, 0.5167] vs. 0.3717 [0.0116, 1.6519] | —          | —            |
| Wk9 PB        | *02/*02 vs. *02/*04                       | 4 vs. 3      | 0.7086 [0.0858, 2.2943] vs. 0.4593 [0.1946, 2.0745] | 0.8571     | 0.9797       |

**Supplementary Table 5:** Percent of IgG B cells detected as VRC01-class testing between treatment groups among detectable response participants. Comparisons with at least 2 samples per group are included and P-values displayed for comparisons with at least 3 samples per group. Testing was done using the Wilcoxon rank-sum test (two-sided,  $\alpha = 0.05$ ) and P-values less than 0.05 are highlighted. Median, minimum, and maximum values are presented by treatment group and time point. Unadjusted and FDR adjusted P-values displayed.

|                          | Comparison       | Sample Sizes | Median (Range)                                      | P Value    |              |  |
|--------------------------|------------------|--------------|-----------------------------------------------------|------------|--------------|--|
|                          |                  |              |                                                     | Unadjusted | FDR Adjusted |  |
| <b>02/*04</b>            |                  |              |                                                     |            |              |  |
| Wk4 MBC                  | 20 µg vs. 100 µg | 4 vs. 4      | 0.0092 [0.0049, 0.0572] vs. 0.0185 [0.0014, 0.0545] | 0.8857     | 0.9048       |  |
| Wk8 MBC                  | 20 µg vs. 100 µg | 4 vs. 4      | 0.0054 [0.0018, 0.0469] vs. 0.0134 [0.0016, 0.0240] | 0.8857     | 0.9048       |  |
| Wk10 MBC                 | 20 µg vs. 100 µg | 4 vs. 4      | 0.0440 [0.0230, 0.1404] vs. 0.1007 [0.0281, 0.1305] | 0.4857     | 0.9048       |  |
| Wk16 MBC                 | 20 µg vs. 100 µg | 4 vs. 4      | 0.0259 [0.0080, 0.0653] vs. 0.0457 [0.0110, 0.0817] | 0.6857     | 0.9048       |  |
| Wk3 GC                   | 20 µg vs. 100 µg | 2 vs. 3      | 2.3429 [1.6281, 3.0577] vs. 2.7265 [0.9546, 5.4440] | —          | —            |  |
| Wk9 PB                   | 20 µg vs. 100 µg | 2 vs. 3      | 0.6629 [0.4731, 0.8527] vs. 0.4593 [0.1946, 2.0745] | —          | —            |  |
| <b>04/*05 or *04/*06</b> |                  |              |                                                     |            |              |  |
| Wk4 MBC                  | 20 µg vs. 100 µg | 6 vs. 3      | 0.0066 [0.0031, 0.0140] vs. 0.0062 [0.0055, 0.0092] | 0.9048     | 0.9048       |  |
| Wk8 MBC                  | 20 µg vs. 100 µg | 6 vs. 2      | 0.0024 [0.0007, 0.0216] vs. 0.0033 [0.0023, 0.0043] | —          | —            |  |

**Supplementary Table 6:** Quasi-likelihood version of Akaike's second-order information criterion (QAICc) results. At each sample time point, the four models (Null, Dose, Allele, and Full) are ranked best-to-worst (lower QAICc is better). Each row gives the number of samples analyzed (n), the number of model parameters (K), the log-likelihood (LL) from a Poisson model fit, and the dispersion (Dispersion) from a quasi-Poisson model fit. The QAICc is computed based on these values (see Methods).

| Model           | n  | K | LL          | Dispersion | QAICc    |
|-----------------|----|---|-------------|------------|----------|
| <b>Wk4 MBC</b>  |    |   |             |            |          |
| Allele          | 35 | 3 | -954.5112   | 67.96823   | 33.63438 |
| Full            | 35 | 4 | -953.5981   | 71.07256   | 36.16783 |
| Dose            | 35 | 3 | -1241.2651  | 102.81975  | 41.70371 |
| Null            | 35 | 2 | -1353.1930  | 110.50062  | 42.45420 |
| <b>Wk8 MBC</b>  |    |   |             |            |          |
| Allele          | 34 | 3 | -467.4507   | 27.70813   | 37.91914 |
| Full            | 34 | 4 | -461.2600   | 30.04265   | 40.08632 |
| Dose            | 34 | 3 | -615.3809   | 47.22338   | 47.76716 |
| Null            | 34 | 2 | -684.2942   | 44.60637   | 49.94195 |
| <b>Wk10 MBC</b> |    |   |             |            |          |
| Allele          | 33 | 3 | -3913.2854  | 275.82562  | 34.31452 |
| Full            | 33 | 4 | -3913.0473  | 284.73788  | 36.91383 |
| Dose            | 33 | 3 | -4507.3975  | 325.05221  | 38.48756 |
| Null            | 33 | 2 | -4997.3051  | 397.41236  | 39.50109 |
| <b>Wk16 MBC</b> |    |   |             |            |          |
| Allele          | 31 | 3 | -1192.3772  | 95.31918   | 31.38919 |
| Full            | 31 | 4 | -1189.6335  | 97.33573   | 33.98238 |
| Dose            | 31 | 3 | -1638.2275  | 127.00529  | 40.55027 |
| Null            | 31 | 2 | -2049.7041  | 178.03677  | 46.54474 |
| <b>Wk3 GC</b>   |    |   |             |            |          |
| Allele          | 26 | 3 | -7480.1546  | 486.41216  | 37.62126 |
| Full            | 26 | 4 | -7182.3606  | 490.01431  | 39.21966 |
| Null            | 26 | 2 | -11266.3607 | 803.67639  | 50.50554 |
| Dose            | 26 | 3 | -10976.7429 | 779.39438  | 51.89263 |
| <b>Wk11 GC</b>  |    |   |             |            |          |
| Null            | 26 | 2 | -8550.4050  | 1001.94407 | 26.62847 |
| Allele          | 26 | 3 | -7690.3863  | 705.77005  | 26.97410 |
| Dose            | 26 | 3 | -8333.1437  | 881.98514  | 28.63592 |
| Full            | 26 | 4 | -7474.9931  | 773.55665  | 29.23106 |
| <b>Wk9 PB</b>   |    |   |             |            |          |
| Allele          | 26 | 3 | -628.4218   | 45.03017   | 34.45853 |
| Dose            | 26 | 3 | -655.0902   | 46.71709   | 35.61993 |
| Full            | 26 | 4 | -613.5097   | 45.92447   | 36.62296 |
| Null            | 26 | 2 | -759.2088   | 49.71729   | 37.58511 |



**Supplementary Table 7:** Parameter estimates and 95% confidence intervals (CIs) from each model (Allele, Full, Dose, and Null) fit using a quasi-Poisson distribution are organized by sample time point. Abbreviated parameter names, Delta, Low and Vacc., are used for the full parameter names defined in the Methods section, Dose delta ( $100\mu\text{g} - 20\mu\text{g}$ ), Dose= $20\mu\text{g}$ , and Vaccine pooled (a single estimate from the Null model for the vaccine dose groups pooled), respectively.

| Parameter       | Allele                | Full                   | Dose                   | Null                 |
|-----------------|-----------------------|------------------------|------------------------|----------------------|
| <b>Wk4 MBC</b>  |                       |                        |                        |                      |
| *02             | 0.021 (0.011, 0.031)  | 0.021 (0.008, 0.033)   |                        |                      |
| *04             | 0.006 (0.001, 0.012)  | 0.006 (0.000, 0.012)   |                        |                      |
| Low             |                       |                        | 0.013 (0.001, 0.025)   |                      |
| Delta           |                       | 0.001 (-0.012, 0.015)  | 0.015 (-0.004, 0.034)  |                      |
| Vacc.           |                       |                        |                        | 0.022 (0.011, 0.032) |
| <b>Wk8 MBC</b>  |                       |                        |                        |                      |
| *02             | 0.011 (0.006, 0.015)  | 0.010 (0.004, 0.015)   |                        |                      |
| *04             | 0.003 (0.001, 0.005)  | 0.003 (0.000, 0.005)   |                        |                      |
| Low             |                       |                        | 0.006 (0.001, 0.012)   |                      |
| Delta           |                       | 0.002 (-0.004, 0.008)  | 0.008 (-0.001, 0.016)  |                      |
| Vacc.           |                       |                        |                        | 0.011 (0.007, 0.015) |
| <b>Wk10 MBC</b> |                       |                        |                        |                      |
| *02             | 0.085 (0.056, 0.115)  | 0.085 (0.041, 0.128)   |                        |                      |
| *04             | 0.052 (0.024, 0.079)  | 0.052 (0.023, 0.080)   |                        |                      |
| Low             |                       |                        | 0.086 (0.045, 0.127)   |                      |
| Delta           |                       | 0.002 (-0.069, 0.073)  | 0.060 (-0.008, 0.128)  |                      |
| Vacc.           |                       |                        |                        | 0.116 (0.078, 0.153) |
| <b>Wk16 MBC</b> |                       |                        |                        |                      |
| *02             | 0.050 (0.032, 0.069)  | 0.052 (0.029, 0.076)   |                        |                      |
| *04             | 0.012 (0.002, 0.021)  | 0.012 (0.001, 0.023)   |                        |                      |
| Low             |                       |                        | 0.026 (0.005, 0.046)   |                      |
| Delta           |                       | -0.004 (-0.030, 0.023) | 0.049 (0.012, 0.087)   |                      |
| Vacc.           |                       |                        |                        | 0.053 (0.030, 0.076) |
| <b>Wk3 GC</b>   |                       |                        |                        |                      |
| *02             | 1.435 (0.874, 1.996)  | 1.665 (1.070, 2.261)   |                        |                      |
| *04             | 0.506 (0.154, 0.858)  | 0.584 (0.185, 0.983)   |                        |                      |
| Low             |                       |                        | 1.353 (0.500, 2.206)   |                      |
| Delta           |                       | -0.523 (-1.067, 0.020) | 0.584 (-0.747, 1.914)  |                      |
| Vacc.           |                       |                        |                        | 1.645 (0.970, 2.320) |
| <b>Wk11 GC</b>  |                       |                        |                        |                      |
| *02             | 0.602 (0.157, 1.047)  | 0.630 (0.113, 1.147)   |                        |                      |
| *04             | 0.103 (-0.127, 0.333) | 0.008 (-0.071, 0.087)  |                        |                      |
| Low             |                       |                        | 0.764 (0.116, 1.411)   |                      |
| Delta           |                       | 0.147 (-0.631, 0.925)  | -0.317 (-1.183, 0.550) |                      |
| Vacc.           |                       |                        |                        | 0.629 (0.154, 1.104) |
| <b>Wk9 PB</b>   |                       |                        |                        |                      |
| *02             | 0.386 (0.274, 0.497)  | 0.268 (-0.009, 0.544)  |                        |                      |
| *04             | 0.159 (-0.008, 0.326) | 0.115 (-0.064, 0.295)  |                        |                      |
| Low             |                       |                        | 0.205 (-0.080, 0.489)  |                      |
| Delta           |                       | 0.225 (-0.274, 0.723)  | 0.508 (0.160, 0.856)   |                      |
| Vacc.           |                       |                        |                        | 0.648 (0.463, 0.834) |

**Supplementary Table 8:** Model estimates and 95% confidence intervals (CIs) from the Allele model for each genotype and time point. The estimated percent (and CI) of IgG B cells that are VRC01-class for each genotype are organized by time point. Genotypes containing the \*05 and \*06 alleles are grouped (e.g., \*02/\*05 or \*02/\*06) since the estimated mean response from the Allele model depends only on the count of \*02 and \*04 alleles. Week 11 germinal center (GC) results are not shown since the Null model ranked better than the Allele model for that time point.

| Genotype           | Percent (95% CI)      |
|--------------------|-----------------------|
| <b>Wk4 MBC</b>     |                       |
| *02/*02            | 0.042 (0.022, 0.062)  |
| *02/*04            | 0.028 (0.017, 0.038)  |
| *02/*05 or *02/*06 | 0.021 (0.011, 0.031)  |
| *04/*04            | 0.013 (0.002, 0.023)  |
| *04/*05 or *04/*06 | 0.006 (0.001, 0.012)  |
| <b>Wk8 MBC</b>     |                       |
| *02/*02            | 0.021 (0.013, 0.029)  |
| *02/*04            | 0.014 (0.009, 0.018)  |
| *02/*05 or *02/*06 | 0.011 (0.006, 0.015)  |
| *04/*04            | 0.006 (0.002, 0.011)  |
| *04/*05 or *04/*06 | 0.003 (0.001, 0.005)  |
| <b>Wk10 MBC</b>    |                       |
| *02/*02            | 0.171 (0.112, 0.229)  |
| *02/*04            | 0.137 (0.100, 0.174)  |
| *02/*05 or *02/*06 | 0.085 (0.056, 0.115)  |
| *04/*04            | 0.103 (0.048, 0.158)  |
| *04/*05 or *04/*06 | 0.052 (0.024, 0.079)  |
| <b>Wk16 MBC</b>    |                       |
| *02/*02            | 0.101 (0.063, 0.138)  |
| *02/*04            | 0.062 (0.042, 0.082)  |
| *02/*05 or *02/*06 | 0.050 (0.032, 0.069)  |
| *04/*04            | 0.023 (0.004, 0.043)  |
| *04/*05 or *04/*06 | 0.012 (0.002, 0.021)  |
| <b>Wk3 GC</b>      |                       |
| *02/*02            | 2.870 (1.747, 3.993)  |
| *02/*04            | 1.941 (1.321, 2.561)  |
| *02/*05 or *02/*06 | 1.435 (0.874, 1.996)  |
| *04/*04            | 1.012 (0.308, 1.716)  |
| *04/*05 or *04/*06 | 0.506 (0.154, 0.858)  |
| <b>Wk9 PB</b>      |                       |
| *02/*02            | 0.771 (0.548, 0.994)  |
| *02/*04            | 0.545 (0.352, 0.738)  |
| *02/*05 or *02/*06 | 0.386 (0.274, 0.497)  |
| *04/*04            | 0.318 (-0.016, 0.652) |
| *04/*05 or *04/*06 | 0.159 (-0.008, 0.326) |

**Supplementary Table 9:** Ratio and 95% confidence interval (CI) estimates from the Allele model for the relative contribution of alleles \*02 and \*04 to the post-vaccination VRC01-class B cell frequencies. Week 11 germinal center (GC) results are not shown since the Null model ranked better than the Allele model for that time point.

| Visit    | Ratio (95% CI)       |
|----------|----------------------|
| Wk3 GC   | 2.836 (0.443, 5.229) |
| Wk4 MBC  | 3.278 (0.000, 6.613) |
| Wk8 MBC  | 3.259 (0.584, 5.934) |
| Wk9 PB   | 2.425 (0.000, 5.124) |
| Wk10 MBC | 1.650 (0.544, 2.757) |
| Wk16 MBC | 4.360 (0.163, 8.557) |

**Supplementary Table 10:** Difference and 95% confidence interval (CI) estimates from the Allele model for the relative contribution of alleles \*02 and \*04 to the post-vaccination VRC01-class B cell frequencies. Week 11 germinal center (GC) results are not shown since the Null model ranked better than the Allele model for that time point.

| Visit    | Difference (95% CI)   | P Value |
|----------|-----------------------|---------|
| Wk3 GC   | 0.929 (0.226, 1.632)  | 0.0095  |
| Wk4 MBC  | 0.015 (0.003, 0.027)  | 0.0169  |
| Wk8 MBC  | 0.007 (0.002, 0.012)  | 0.0030  |
| Wk9 PB   | 0.227 (0.018, 0.435)  | 0.0333  |
| Wk10 MBC | 0.034 (-0.009, 0.076) | 0.1239  |
| Wk16 MBC | 0.039 (0.017, 0.061)  | 0.0006  |

**Supplementary Table 11:** Ratio estimates and 95% confidence intervals (CIs) of the relative contributions of alleles \*02 and \*04 to the naive repertoire. Estimates, 95% CIs and P-values are based on the frequency of mRNA expression and unique HCRD3s among vaccine recipients with homozygous genotypes (\*02/\*02 and \*04/\*04) or heterozygous genotype \*02/\*04 as described in the Methods section.

| Frequency    | Group        | Ratio | 95% CI     | P-value |
|--------------|--------------|-------|------------|---------|
| mRNA         | Homozygote   | 3.9   | 3.0 to 5.3 | <0.0001 |
| mRNA         | Heterozygote | 4.2   | 3.3 to 5.1 | 0.0001  |
| Unique HCDR3 | Homozygote   | 3.8   | 3.1 to 4.9 | <0.0001 |
| Unique HCDR3 | Heterozygote | 3.7   | 3.0 to 4.5 | <0.0001 |

**Supplementary Table 12:** Ratio of inferred-germline B cell receptor (BCR) assignment among VRC01-class B cells for eight heterozygous IGHV1-2 \*02/\*04 vaccine recipients combined across time points. The median of these eight ratios is also reported. Four of 873 assignments were ambiguous and were given one half weight to each allele.

| dose  | ID     | *02   | *04  | Ratio  |
|-------|--------|-------|------|--------|
| 20µg  | 046    | 40.5  | 5.5  | 7.364  |
| 20µg  | 077    | 38.0  | 13.0 | 2.923  |
| 20µg  | 100    | 140.0 | 18.0 | 7.778  |
| 20µg  | 187    | 31.0  | 15.0 | 2.067  |
| 100µg | 062    | 88.0  | 21.0 | 4.190  |
| 100µg | 064    | 138.0 | 19.0 | 7.263  |
| 100µg | 112    | 68.0  | 4.0  | 17.000 |
| 100µg | 193    | 221.5 | 12.5 | 17.720 |
|       | Median |       |      | 7.313  |

**Supplementary Table 13:** Ratio of inferred-germline B cell receptor (BCR) assignment among VRC01-class B cells for eight heterozygous IGHV1-2 \*02/\*04 vaccine recipients organized by time point. The median ratio is also reported for each time point. Four of 873 assignments were ambiguous and were given one half weight to each allele.

| dose            | ID  | *02  | *04 | Ratio  |
|-----------------|-----|------|-----|--------|
| <b>Wk4 MBC</b>  |     |      |     |        |
| 20µg            | 046 | 6.0  | 1.0 | 6.000  |
| 20µg            | 077 | 5.5  | 1.5 | 3.667  |
| 20µg            | 100 | 30.0 | 4.0 | 7.500  |
| 20µg            | 187 | 2.0  | 5.0 | 0.400  |
| 100µg           | 062 | 1.0  | 2.0 | 0.500  |
| 100µg           | 064 | 27.0 | 5.0 | 5.400  |
| 100µg           | 112 | 8.0  | 2.0 | 4.000  |
| 100µg           | 193 | 37.0 | 3.0 | 12.333 |
| Median          |     |      |     | 4.700  |
| <b>Wk8 MBC</b>  |     |      |     |        |
| 20µg            | 046 | 1.0  | 0.0 | Inf    |
| 20µg            | 077 | 7.5  | 0.5 | 15.000 |
| 20µg            | 100 | 24.0 | 2.0 | 12.000 |
| 20µg            | 187 | 2.0  | 2.0 | 1.000  |
| 100µg           | 062 | 3.0  | 0.0 | Inf    |
| 100µg           | 064 | 22.0 | 1.0 | 22.000 |
| 100µg           | 112 | 17.0 | 1.0 | 17.000 |
| 100µg           | 193 | 15.0 | 2.0 | 7.500  |
| Median          |     |      |     | 16.000 |
| <b>Wk10 MBC</b> |     |      |     |        |
| 20µg            | 046 | 27.0 | 4.0 | 6.750  |
| 20µg            | 077 | 1.0  | 2.0 | 0.500  |
| 20µg            | 100 | 16.0 | 7.0 | 2.286  |
| 20µg            | 187 | 18.0 | 3.0 | 6.000  |
| 100µg           | 062 | 11.0 | 7.0 | 1.571  |
| 100µg           | 064 | 18.0 | 4.0 | 4.500  |
| 100µg           | 112 | 11.0 | 0.0 | Inf    |
| 100µg           | 193 | 34.5 | 2.5 | 13.800 |
| Median          |     |      |     | 5.250  |
| <b>Wk16 MBC</b> |     |      |     |        |
| 20µg            | 046 | 6.5  | 0.5 | 13.000 |
| 20µg            | 077 | 4.0  | 1.0 | 4.000  |
| 20µg            | 100 | 28.0 | 5.0 | 5.600  |
| 20µg            | 187 | 9.0  | 5.0 | 1.800  |
| 100µg           | 062 | 8.0  | 5.0 | 1.600  |
| 100µg           | 064 | 34.0 | 2.0 | 17.000 |
| 100µg           | 112 | 8.0  | 0.0 | Inf    |
| 100µg           | 193 | 23.0 | 3.0 | 7.667  |
| Median          |     |      |     | 6.633  |

**Supplementary Table 13:** Ratio of inferred-germline B cell receptor (BCR) assignment among VRC01-class B cells for eight heterozygous IGHV1-2 \*02/\*04 vaccine recipients organized by time point. The median ratio is also reported for each time point. Four of 873 assignments were ambiguous and were given one half weight to each allele. (*continued*)

| dose           | ID  | *02  | *04 | Ratio  |
|----------------|-----|------|-----|--------|
| <b>Wk3 GC</b>  |     |      |     |        |
| 20µg           | 046 |      |     |        |
| 20µg           | 077 | 19.0 | 8.0 | 2.375  |
| 20µg           | 100 | 32.0 | 0.0 | Inf    |
| 20µg           | 187 |      |     |        |
| 100µg          | 062 | 49.0 | 7.0 | 7.000  |
| 100µg          | 064 |      |     |        |
| 100µg          | 112 | 2.0  | 0.0 | Inf    |
| 100µg          | 193 | 31.0 | 0.0 | Inf    |
| Median         |     |      |     | Inf    |
| <b>Wk11 GC</b> |     |      |     |        |
| 20µg           | 046 |      |     |        |
| 20µg           | 077 |      |     |        |
| 20µg           | 100 | 8.0  | 0.0 | Inf    |
| 20µg           | 187 |      |     |        |
| 100µg          | 062 | 16.0 | 0.0 | Inf    |
| 100µg          | 064 | 1.0  | 0.0 | Inf    |
| 100µg          | 112 | 22.0 | 0.0 | Inf    |
| 100µg          | 193 | 51.0 | 0.0 | Inf    |
| Median         |     |      |     | Inf    |
| <b>Wk9 PB</b>  |     |      |     |        |
| 20µg           | 046 |      |     |        |
| 20µg           | 077 | 1.0  | 0.0 | Inf    |
| 20µg           | 100 | 2.0  | 0.0 | Inf    |
| 20µg           | 187 |      |     |        |
| 100µg          | 062 |      |     |        |
| 100µg          | 064 | 36.0 | 7.0 | 5.143  |
| 100µg          | 112 | 0.0  | 1.0 | 0.000  |
| 100µg          | 193 | 30.0 | 2.0 | 15.000 |
| Median         |     |      |     | 15.000 |

## Supplementary References

- 52 Scheid, J. F. *et al.* Sequence and structural convergence of broad and potent HIV antibodies that mimic CD4 binding. *Science* **333**, 1633-1637, doi:10.1126/science.1207227 (2011).
- 53 Huang, J. *et al.* Identification of a CD4-Binding-Site Antibody to HIV that Evolved Near-Pan Neutralization Breadth. *Immunity* **45**, 1108-1121, doi:10.1016/j.immuni.2016.10.027 (2016).
- 54 Sajadi, M. M. *et al.* Identification of Near-Pan-neutralizing Antibodies against HIV-1 by Deconvolution of Plasma Humoral Responses. *Cell* **173**, 1783-1795 e1714, doi:10.1016/j.cell.2018.03.061 (2018).
- 55 Jardine, J. G. *et al.* Minimally Mutated HIV-1 Broadly Neutralizing Antibodies to Guide Reductionist Vaccine Design. *PLoS pathogens* **12**, e1005815, doi:10.1371/journal.ppat.1005815 (2016).
